# Supplementary material for: Mammalian translation elongation factor eEF1A2: X-ray structure and new features of GDP/GTP exchange mechanism in higher eukaryotes
Source: PubMed Central journal article supplement — Nucleic Acids Res. 2014 Oct 17;42(20):12939–48. doi: 10.1093/nar/gku974 (PMC4227793; doi:10.1093/nar/gku974), 2014-10-17
Supplement: supp_gku974_nar-01734-r-2014-File006.pdf [file supp_gku974_nar-01734-r-2014-File006.pdf]

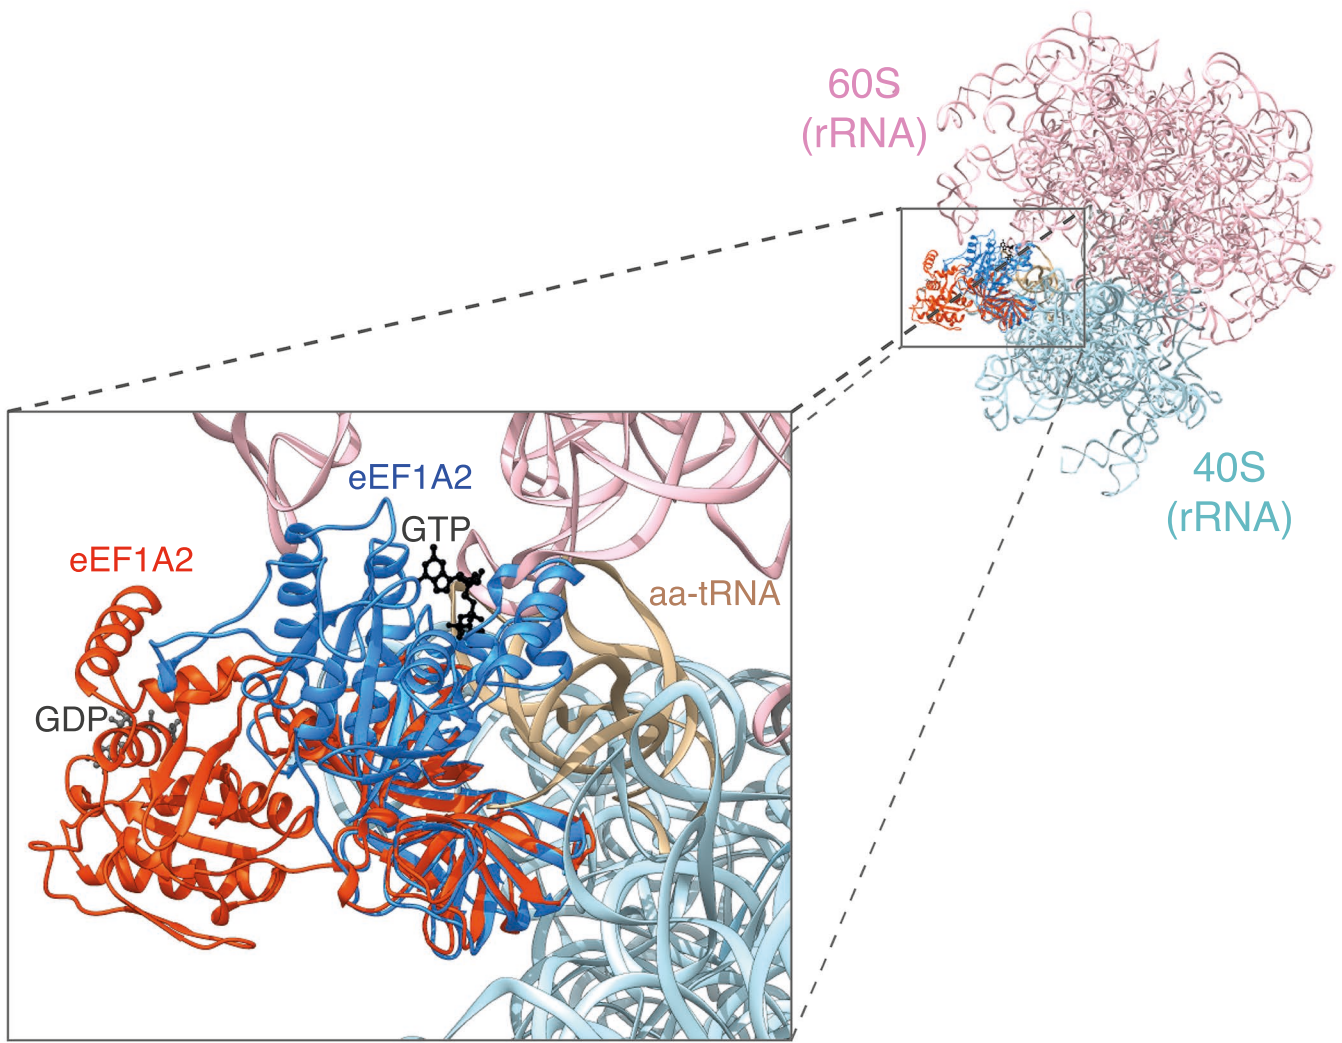

**Supplementary Figure S1.** Rotation of domain I from ribosome upon GTP hydrolysis is an initial step in the dissociation of eEF1A\*GDP from 80S ribosome. The X-ray structures of yeast 80S ribosome and of 70S ribosome\*EF-Tu\*GDP-CP\*aminoacyl-tRNA were superimposed to fit the ternary complex to 80S ribosome. EF-Tu\*GDPCP was substituted with the aEF1A\*GTP or eEF1A2\*GDP structures. Domain (II+III) bodies were aligned good. Some clashes of the aEF1A domain I and rRNA occur, probably resulting from the imperfect fitting of the 80S and 70S ribosomes. Colors: orange red - eEF1A2\*GDP, dark blue - aEF1A\*GTP, yellow – aminoacyl-tRNA in the A/T site, light blue - 18S rRNA (40S subunit), pink – rRNAs of 60S subunit, brown - sarcin-ricin loop of 28S rRNA.
